# Supplementary material for: A three-dimensional MnO2/graphene hybrid as a binder-free supercapacitor electrode
Source: Royal Society of Chemistry journal article supplement (doi:10.1039/c5ra14411f), 2015-01-01
Supplement: c5ra14411f1.pdf [file c5ra14411f1.pdf]

## Supporting Information

# A Three-Dimensional MnO<sub>2</sub>/Graphene hybrid as binder-free supercapacitor electrode

Chuanyin Xiong\*, Tiehu Li, Muhammad Khan, Hao Li, Tingkai Zhao

School of Materials Science and Engineering, Northwestern Polytechnical University, Xi'an 710072,

PR China

\* To whom correspondence should be addressed. Tel: 1-365-9196144

E-mail: [xiongchuanyin@126.com](mailto:xiongchuanyin@126.com)

### Table of Contents

Figure S1, Schematic illustration of electrodeposition of the MnO<sub>2</sub> nanowall arrays.

Figure S2, SEM image of MnO<sub>2</sub>800.

Figure S3, The CV curve of electrodeposition of MnO<sub>2</sub>700 nanowall arrays at different scan rates from 50 mV s<sup>-1</sup> to 400 mV s<sup>-1</sup>.

Figure S4. The GCD curves of electrodeposition of MnO<sub>2</sub>/GR700 nanowall arrays at current densities of 1, 1.5, 2, 2.5 and 3 A g<sup>-1</sup>.

Figure S5. The CV curves of different quality of MnO<sub>2</sub>/GR700 electrodes at various scan rates range of 50–400 mV s<sup>-1</sup>.

Table S1 The related values of energy and power densities of MnO<sub>2</sub>/GR700 electrode at different scan rates range of 10–500 mV s<sup>-1</sup>.

---

\* Corresponding author. Tel.: +86 029 88460337; fax: +86 029 88460337.

E-mail address: [xiongchuanyin@126.com](mailto:xiongchuanyin@126.com)

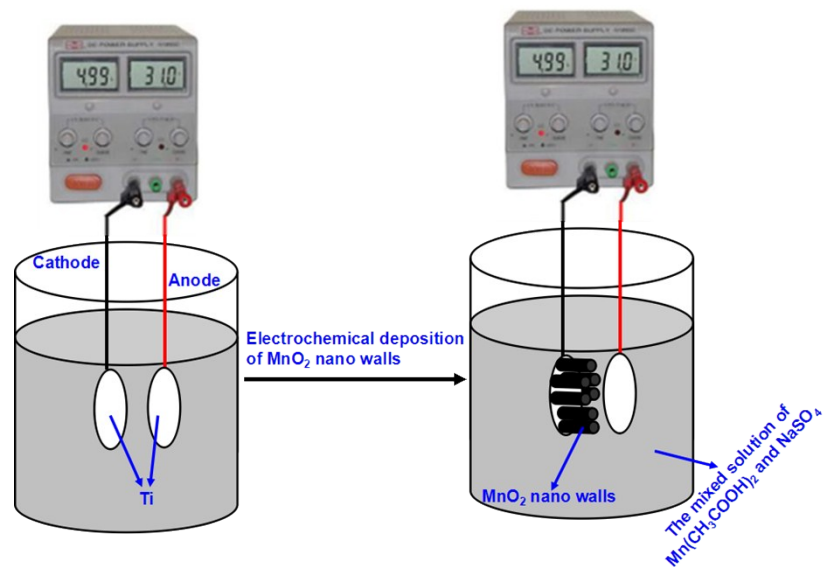

Figure S1. Schematic illustration of electrodeposition of the MnO<sub>2</sub> nanowall arrays.

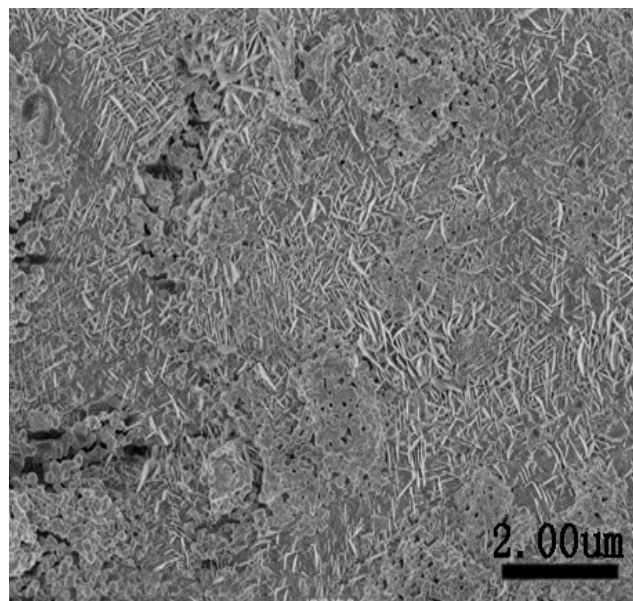

Figure S2. The SEM image of MnO<sub>2</sub>800

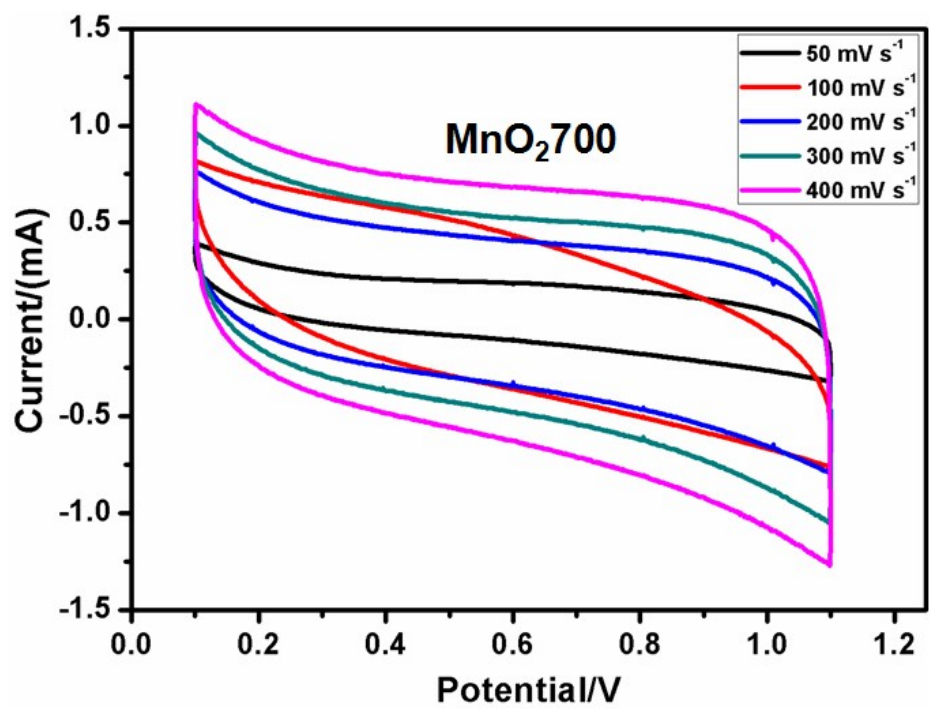

Figure S3. The CV profiles of electrodeposition of MnO<sub>2</sub>700 nanowall arrays at different scan rates from 50 to 400 mV s<sup>-1</sup>

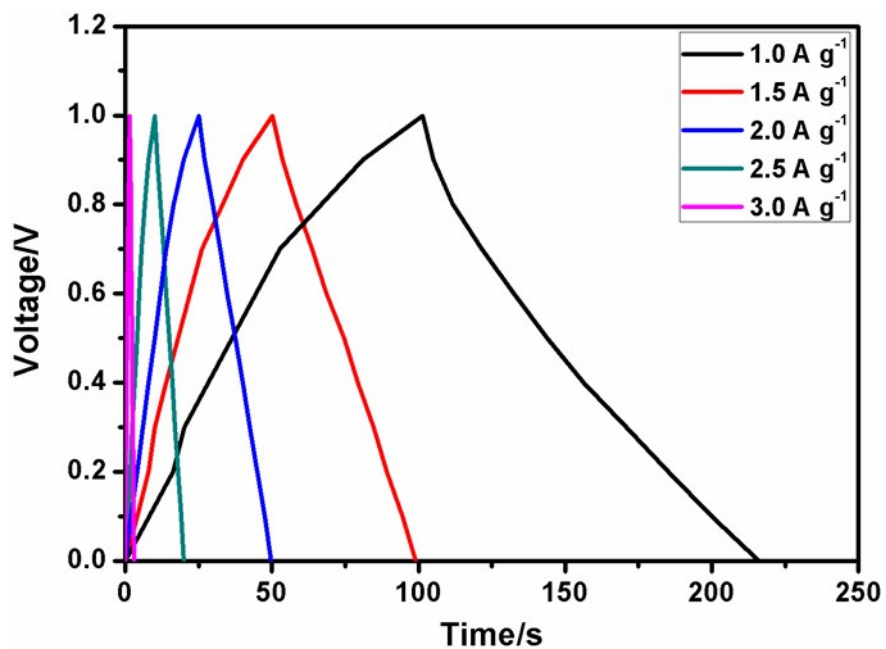

Figure S4. The GCD curves of electrodeposition of MnO<sub>2</sub>/GR700 nanowall arrays at current densities of 1, 1.5, 2, 2.5 and 3 A g<sup>-1</sup>

Table S1 The related values of energy and power densities of MnO<sub>2</sub>/GR700 electrode at different scan rates range of 10 – 500 mV s<sup>-1</sup> with their corresponding to the order of the Fig. 5 from left to right.

| Scan rates (mV s <sup>-1</sup> ) | <i>P</i> (W kg <sup>-1</sup> ) | <i>W</i> (Wh kg <sup>-1</sup> ) |
|----------------------------------|--------------------------------|---------------------------------|
| 10                               | 439                            | 56.24                           |
| 50                               | 836                            | 48.63                           |
| 100                              | 2734                           | 36.89                           |
| 200                              | 7270                           | 23.68                           |
| 300                              | 7961                           | 14.19                           |
| 400                              | 8798                           | 8.32                            |
| 500                              | 9657                           | 6.23                            |

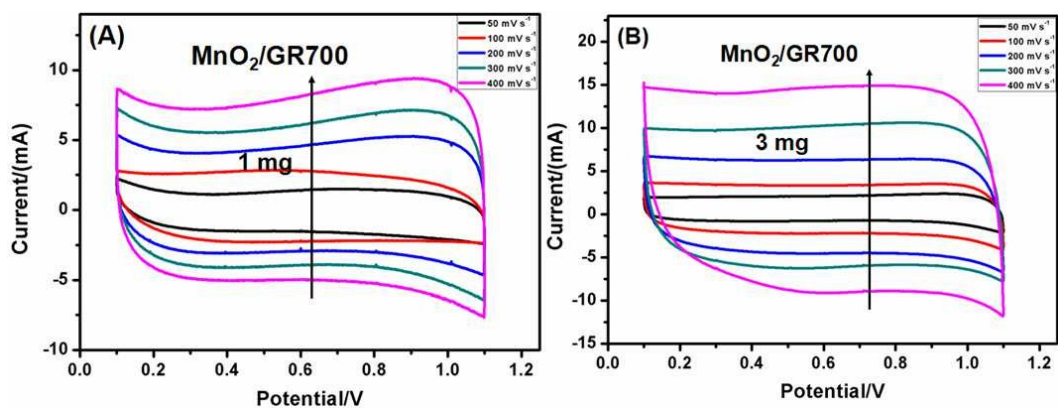

Figure S5. The CV curves of MnO<sub>2</sub>/GR700 electrodes at various scan rates range of 50 – 400 mV s<sup>-1</sup> for large mass loading. The mass of (A) 1 mg; (B) 3 mg.
